# Supplementary material for: Cohort profile of BIGPROMISE: a perioperative biobank of a high-risk surgical population
Source: PubMed Central journal article supplement — BMJ Open. 2024 Jun 11;14(6):e078307. doi: 10.1136/bmjopen-2023-078307 (PMC11168131; doi:10.1136/bmjopen-2023-078307), 2024-06-11
Supplement: bmjopen-2023-078307supp001.pdf [file bmjopen-2023-078307supp001.pdf]

## Appendix 1. Surgical procedures

### **Cardiac surgery**

- Coronary artery bypass grafting
- Aortic valve replacement or repair
- Aortic valve replacement with aortic root and ascending aorta replacement (Bentall procedure)
- Mitral valve replacement or repair
- Tricuspid valve replacement or repair
- Combination of procedures above

### **Pulmonary surgery**

- Pneumonectomy
- Lobectomy
- Bilobectomy
- Sleeve lobectomy
- Segmentectomy

### **Gastrointestinal surgery**

- Small bowel resection
- Ileocecal resection
- Sigmoid resection
- Hemicolectomy right or left
- Transverse colon resection
- Low Anterior resection
- Abdominoperineal resection
- HIPEC

### **Hepatobiliary surgery**

- Pancreaticoduodenectomy (Whipple)
- Pylorus preserving pancreaticoduodenectomy (PPPD)

- Distal pancreatectomy
- Total pancreatectomy

### **Vascular surgery**

- Open aortic surgery
  - o Abdominal aortic aneurysm repair
- Endovascular aortic surgery
  - o Endovascular aneurysm repair
  - o Fenestrated endovascular aneurysm repair
  - o Covered endovascular repair of the aortic bifurcation
- Suprainguinal and/or infrainguinal peripheral vascular surgery
  - o Percutaneous transluminal angioplasty
  - o Bypass surgery
  - o Endarterectomy
  - o Thrombectomy
- Combination of procedures above

### **Urologic surgery**

- Ureteroileostomy (Bricker's procedure)
