# Supplementary material for: Cohort profile of BIGPROMISE: a perioperative biobank of a high-risk surgical population
Source: PubMed Central journal article supplement — BMJ Open. 2024 Jun 11;14(6):e078307. doi: 10.1136/bmjopen-2023-078307 (PMC11168131; doi:10.1136/bmjopen-2023-078307), 2024-06-11
Supplement: bmjopen-2023-078307supp002.pdf [file bmjopen-2023-078307supp002.pdf]

**Endpoint definitions:****Table 1: All-cause mortality**

| Endpoint                   | Definition                      | Excluded | Additionally reported                | Limitation and comments | Ref.                        |
|----------------------------|---------------------------------|----------|--------------------------------------|-------------------------|-----------------------------|
| <b>All-cause mortality</b> | Death within 30 days of surgery |          | 1-year mortality<br>2-year mortality |                         | <sup>1</sup> STeP mortality |

**Table 2: Postoperative pulmonary complications**

| Endpoint                   | Definition                                                                                                                                                                                                                                                                                                                                                                                                                                                                                                                                                                                                                                                                                                                                   | Excluded | Limitation and comments                                                                                             | Ref.                         |
|----------------------------|----------------------------------------------------------------------------------------------------------------------------------------------------------------------------------------------------------------------------------------------------------------------------------------------------------------------------------------------------------------------------------------------------------------------------------------------------------------------------------------------------------------------------------------------------------------------------------------------------------------------------------------------------------------------------------------------------------------------------------------------|----------|---------------------------------------------------------------------------------------------------------------------|------------------------------|
| <b>Respiratory failure</b> | Postoperative PaO <sub>2</sub> < 8 kPa (60 mmHg) on room air, a PaO <sub>2</sub> :FI0 <sub>2</sub> ratio <40 kPa (300 mmHg) or arterial oxyhaemoglobin saturation measured with pulse oximetry < 90% and requiring oxygen therapy or 5L O <sub>2</sub> /min oxygen therapy when arterial saturation or peripheral saturation on room air is not available OR Need for mechanical ventilation >24h postoperative*<br>Postoperative oxygen supplementation via a nasal cannula on the day of surgery is seen as common practice and therefore not registered as postoperative respiratory failure. Persistent oxygen supplementation on postoperative day 1 will be registered as respiratory failure if fulfilling the above stated criteria. |          | EPCO definition of respiratory failure (as defined under postoperative pulmonary complications) complemented with * | EPCO definition <sup>2</sup> |

**Table 3: Causes of severe respiratory failure**

| Causes of severe respiratory failure |                                                                                                                                                                                                                                                                                                       | ref                                     |
|--------------------------------------|-------------------------------------------------------------------------------------------------------------------------------------------------------------------------------------------------------------------------------------------------------------------------------------------------------|-----------------------------------------|
| <b>ARDS</b>                          | Berlin definition for ARDS                                                                                                                                                                                                                                                                            | Berlin definition for ARDS <sup>3</sup> |
| <b>Pleural effusion</b>              | Chest radiograph demonstrating blunting of the costophrenic angle, loss of sharp silhouette of the ipsilateral hemidiaphragm in upright position, evidence of displacement of adjacent anatomical structures or (in supine position) a hazy opacity in one hemithorax with preserved vascular shadows | EPCO <sup>2</sup>                       |
| <b>Pneumothorax</b>                  | Air in the pleural space with no vascular bed surrounding the visceral pleura                                                                                                                                                                                                                         | EPCO <sup>2</sup>                       |

|                               |                                                                                                                                                                                                                                                                                      |                                        |
|-------------------------------|--------------------------------------------------------------------------------------------------------------------------------------------------------------------------------------------------------------------------------------------------------------------------------------|----------------------------------------|
| <b>Atelectasis</b>            | Lung opacification with a shift of the mediastinum, hilum or hemidiaphragm toward the affected area, and compensatory over-inflation in the adjacent non-atelectatic lung                                                                                                            | EPCO <sup>2</sup>                      |
| <b>Respiratory infection</b>  | See table 7                                                                                                                                                                                                                                                                          | StEP Infection and sepsis <sup>4</sup> |
| <b>Aspiration pneumonitis</b> | Acute lung injury after the inhalation of regurgitated gastric contents                                                                                                                                                                                                              | EPCO <sup>2</sup>                      |
| <b>Bronchospasm</b>           | Newly detected expiratory wheezing treated with bronchodilators                                                                                                                                                                                                                      | EPCO <sup>2</sup>                      |
| <b>Cardiopulmonary edema</b>  | An elevated jugular venous pressure, respiratory rales/crackles and crepitations, presence of S3 and at least one of the following radiographic findings: (a) Vascular redistribution (b) Interstitial pulmonary oedema (c) Frank alveolar pulmonary oedema AND NT-proBNP >300 pg/ml | Designation trial <sup>5</sup>         |
| <b>Pulmonary embolism</b>     | A clinical diagnosis of PE confirmed by helical CT-scan                                                                                                                                                                                                                              | STeP cardiovascular <sup>6</sup>       |
| <b>Unknown</b>                |                                                                                                                                                                                                                                                                                      |                                        |

**Table 4: Postoperative cardiovascular complications**

| Endpoint                                           | Definition                                                                                                                                                                                                                                                      | Excluded                                                                                                                                                                              | Limitation                              | Ref.                                                                                                 |
|----------------------------------------------------|-----------------------------------------------------------------------------------------------------------------------------------------------------------------------------------------------------------------------------------------------------------------|---------------------------------------------------------------------------------------------------------------------------------------------------------------------------------------|-----------------------------------------|------------------------------------------------------------------------------------------------------|
| <b>MACE</b>                                        | Composite outcome including: <ul style="list-style-type: none"> <li>- Cardiac death</li> <li>- Non-fatal cardiac arrest</li> <li>- Coronary revascularization</li> <li>- Myocardial infarction</li> </ul>                                                       | <ul style="list-style-type: none"> <li>- Pulmonary embolism</li> <li>- Hemorrhage</li> <li>- Deep venous thrombosis</li> <li>- All-cause mortality</li> </ul>                         |                                         | STeP cardiovascular <sup>6</sup>                                                                     |
| <b>Cardiac death</b>                               | Death with a vascular cause and included those deaths after a myocardial infarction, cardiac arrest, and cardiac revascularization procedure.                                                                                                                   | <ul style="list-style-type: none"> <li>- Death after pulmonary embolism</li> <li>- Death after hemorrhage</li> <li>- Multi-organ failure</li> <li>- Cause of death unknown</li> </ul> |                                         | STeP cardiovascular <sup>6</sup>                                                                     |
| <b>Non-fatal cardiac arrest</b>                    | Successful resuscitation from either documented or presumed ventricular fibrillation, sustained ventricular tachycardia, asystole, or pulseless electrical activity requiring cardiopulmonary resuscitation, pharmacological therapy, or cardiac defibrillation |                                                                                                                                                                                       |                                         | STeP cardiovascular <sup>6</sup>                                                                     |
| <b>Coronary revascularization</b>                  | Percutaneous coronary intervention or coronary artery bypass graft surgery within 30 days of the index surgery.                                                                                                                                                 |                                                                                                                                                                                       |                                         | STeP cardiovascular <sup>6</sup>                                                                     |
| <b>Myocardial infarction in noncardiac surgery</b> | Acute myocardial injury with clinical evidence of acute myocardial ischaemia and with detection of an increase or decrease in cTn values with at least one value above the 99th percentile URL and at least one of the following:                               |                                                                                                                                                                                       | No routine ECG after noncardiac surgery | STeP cardiovascular and 4 <sup>th</sup> universal definition of myocardial infarction <sup>6,7</sup> |

|                                                       |                                                                                                                                                                                                                                                                                                                                                                                                                                                                                                                                                                                                                                                                              |  |  |                                                                                  |
|-------------------------------------------------------|------------------------------------------------------------------------------------------------------------------------------------------------------------------------------------------------------------------------------------------------------------------------------------------------------------------------------------------------------------------------------------------------------------------------------------------------------------------------------------------------------------------------------------------------------------------------------------------------------------------------------------------------------------------------------|--|--|----------------------------------------------------------------------------------|
|                                                       | <ol style="list-style-type: none"> <li>1. Symptoms of myocardial ischaemia</li> <li>2. New ischaemic ECG changes</li> <li>3. Development of pathological Q waves</li> <li>4. Imaging evidence of new loss of viable myocardium or new regional wall motion abnormality in a pattern consistent with an ischaemic aetiology</li> <li>5. Identification of a coronary thrombus by angiography or autopsy Post-mortem demonstration of acute atherothrombosis in the artery supplying the infarcted myocardium Cardiac death in patients with symptoms suggestive of myocardial ischaemia and presumed new ischaemic ECG changes before cTn values become available.</li> </ol> |  |  |                                                                                  |
| <b>Acute myocardial infarction in cardiac surgery</b> | <p>Elevation of cTn values &gt; 10 times the 99th percentile URL in patients with normal baseline cTn values. In patients with elevated pre-procedure cTn in whom cTn levels are stable (<math>\leq 20\%</math> variation) or falling, the postprocedure cTn must rise by &gt; 20%. However, the absolute postprocedural value still must be &gt; 10 times the 99th percentile URL. In</p>                                                                                                                                                                                                                                                                                   |  |  | <p>4<sup>th</sup> universal definition of myocardial infarction <sup>7</sup></p> |

|                                                      |                                                                                                                                                                                                                                                                                                                                                                                                                                                                                                                                                                                                               |  |                                                                                                                                                            |                                                                                                   |
|------------------------------------------------------|---------------------------------------------------------------------------------------------------------------------------------------------------------------------------------------------------------------------------------------------------------------------------------------------------------------------------------------------------------------------------------------------------------------------------------------------------------------------------------------------------------------------------------------------------------------------------------------------------------------|--|------------------------------------------------------------------------------------------------------------------------------------------------------------|---------------------------------------------------------------------------------------------------|
|                                                      | <p>addition, one of the following elements is required:</p> <ol style="list-style-type: none"> <li>1. Development of new pathological Q waves;*</li> <li>2. Angiographic documented new graft occlusion or new native coronary artery occlusion;</li> <li>3. Imaging evidence of new loss of viable myocardium or new regional wall motion abnormality in a pattern consistent with an ischaemic aetiology.</li> </ol> <p>*Isolated development of new pathological Q waves meets cardiac myocardial infarction criteria if cTn values are elevated and rising but &lt; 10 times the 99th percentile URL.</p> |  |                                                                                                                                                            |                                                                                                   |
| <b>Acute myocardial injury in noncardiac surgery</b> | <p>Detection of an elevated and increased or decreased cTn value above the 99th percentile URL is defined as myocardial injury.</p> <p><b>The diagnosis will be acute myocardial injury if there is no confirmed diagnosis of myocardial infarction</b></p>                                                                                                                                                                                                                                                                                                                                                   |  |                                                                                                                                                            | StEP cardiovascular, 4 <sup>th</sup> universal definition of myocardial infarction <sup>6,7</sup> |
| <b>Acute myocardial injury in cardiac surgery</b>    | <p>Elevation of cTn values &gt; 10 times the 99th percentile URL in patients with normal baseline cTn values. In patients with elevated pre-procedure cTn in whom cTn levels are stable (<math>\leq</math> 20% variation) or falling, the postprocedure cTn must rise by &gt; 20%. However, the absolute postprocedural value still must be &gt; 10 times the</p>                                                                                                                                                                                                                                             |  | In rhythm surgery and valve surgery substantial amount of troponin release will be related to the direct procedure related tissue trauma and not ischemia. | 4 <sup>th</sup> universal definition of myocardial infarction <sup>7</sup> + own interpretation   |

|                                     |                                                                                                                                                                                                                                                                                                                                                                                                     |  |                                                                                                         |                                                                 |
|-------------------------------------|-----------------------------------------------------------------------------------------------------------------------------------------------------------------------------------------------------------------------------------------------------------------------------------------------------------------------------------------------------------------------------------------------------|--|---------------------------------------------------------------------------------------------------------|-----------------------------------------------------------------|
|                                     | 99th percentile URL. <b>The diagnosis will be acute myocardial injury if there is no confirmed diagnosis of myocardial infarction</b>                                                                                                                                                                                                                                                               |  |                                                                                                         |                                                                 |
| <b>Acute heart failure</b>          | An elevated jugular venous pressure, respiratory rales/crackles and crepitations, presence of S3 and at least one of the following radiographic findings: (a) Vascular redistribution (b) Interstitial pulmonary oedema (c) Frank alveolar pulmonary oedema AND NT-proBNP >300 pg/ml                                                                                                                |  | Definition of heart failure did not reach consensus in the StEP initiative.                             | StEP cardiovascular, heart failure guideline ESC <sup>6,8</sup> |
| <b>Pulmonary embolism</b>           | A clinical diagnosis of PE confirmed by helical CT-scan                                                                                                                                                                                                                                                                                                                                             |  | Diagnosis will be missed in a large portion of patients                                                 | StEP cardiovascular <sup>6</sup>                                |
| <b>Atrial fibrillation/ flutter</b> | New onset of irregularly irregular heart rate in the absence of P waves lasting at least 30 s or for the duration of the ECG recording (if <30 s)                                                                                                                                                                                                                                                   |  | No routine ECG or holter registration postoperatively, except for patients admitted to the ICU or PACU. | StEP <sup>6</sup>                                               |
| <b>Stroke</b>                       | An embolic, thrombotic or haemorrhagic cerebral event with motor, sensory or cognitive dysfunction (e.g. hemiplegia, hemiparesis, aphasia, sensory deficit, impaired memory).<br><b>Mild:</b> Results in only temporary harm and would not require specific clinical treatment.<br><b>Moderate:</b> More serious complication but one which does not usually result in permanent harm or functional |  |                                                                                                         | EPCO definition <sup>2</sup>                                    |

|  |                                                                                                                                                                                                          |  |  |  |
|--|----------------------------------------------------------------------------------------------------------------------------------------------------------------------------------------------------------|--|--|--|
|  | <p>limitation. Requires clinical treatment.</p> <p><b>Severe:</b> Results in significant prolongation of hospital stay and/or permanent functional limitation or death. Requires clinical treatment.</p> |  |  |  |
|--|----------------------------------------------------------------------------------------------------------------------------------------------------------------------------------------------------------|--|--|--|

**Table 5: Definitions exclusion criteria**

|                               |                                                                                                                                       |  |                                                                     |
|-------------------------------|---------------------------------------------------------------------------------------------------------------------------------------|--|---------------------------------------------------------------------|
| <b>Deep venous thrombosis</b> | Diagnosis confirmed by 2-Point Compression Ultrasonography of the Lower Extremity                                                     |  | StEP <sup>6</sup> + adaptation to Dutch clinical practice standards |
| <b>Multi-organ failure</b>    | Altered function in two or more organ systems during an acute illness such that homeostasis cannot be maintained without intervention |  | Definitions for sepsis and organ failure <sup>9</sup>               |
| <b>Hemorrhage</b>             | Acute blood loss                                                                                                                      |  |                                                                     |
| <b>All-cause mortality</b>    | Any cause of death that doesn't fulfill the criteria for cardiac death                                                                |  |                                                                     |

**Table 6: Sepsis**

| <b>Endpoint</b> | <b>Definition</b>                                                                | <b>Excluded</b> | <b>Additionally reported</b>             | <b>Limitation</b> | <b>Ref.</b>                            |
|-----------------|----------------------------------------------------------------------------------|-----------------|------------------------------------------|-------------------|----------------------------------------|
| <b>Sepsis</b>   | Increase in SOFA score of 2 or more, with evidence of infection, within 30 days. |                 | Suspected site of infection; SOFA score. |                   | StEP Infection and sepsis <sup>4</sup> |

Table 7: Postoperative respiratory infectious complication

| Endpoint                                                                               | Definition                                                                                                                                                                                                                                                                                                                                                                                                                                                                                                                                                                                                                                                                                                                                                                                                                                                                                                                   | Excluded | Additionally reported | Limitation | Ref.                                   |
|----------------------------------------------------------------------------------------|------------------------------------------------------------------------------------------------------------------------------------------------------------------------------------------------------------------------------------------------------------------------------------------------------------------------------------------------------------------------------------------------------------------------------------------------------------------------------------------------------------------------------------------------------------------------------------------------------------------------------------------------------------------------------------------------------------------------------------------------------------------------------------------------------------------------------------------------------------------------------------------------------------------------------|----------|-----------------------|------------|----------------------------------------|
| <p><b>Postoperative respiratory infectious complication</b></p> <p><b>Possible</b></p> | <p><b>Signs/Symptoms/Laboratory:</b> one of the following:</p> <ul style="list-style-type: none"> <li>• Fever (&gt; 38.0°C or &gt; 100.4°F)</li> <li>• Leukopenia (<math>\leq</math> 4000 WBC/mm<sup>3</sup>) or leukocytosis (<math>\geq</math> 12,000 WBC/mm<sup>3</sup>)</li> <li>• For adults <math>\geq</math> 70 years old, altered mental status with no other recognized cause</li> </ul> <p><b>OR</b></p> <ul style="list-style-type: none"> <li>• New onset of purulent sputum or change in character of sputum, or increased respiratory secretions, or increased suctioning requirements</li> <li>• New onset or worsening cough, or dyspnea, or tachypnea</li> <li>• Rales or bronchial breath sounds</li> <li>• Worsening gas exchange</li> </ul> <p><b>AND</b></p> <p><b>Imaging:</b> One chest imaging test result with at least one of the following: Pulmonary infiltrate, consolidation or cavitation</p> |          | Cause: CAP, HAP, VAP, |            |                                        |
| <p><b>Probable</b></p>                                                                 | <p><b>Signs/Symptoms/Laboratory:</b> at least one of the following:</p> <ul style="list-style-type: none"> <li>• Fever (&gt; 38.0°C or &gt; 100.4°F)</li> <li>• Leukopenia (<math>\leq</math> 4000 WBC/mm<sup>3</sup>) or leukocytosis (<math>\geq</math> 12,000 WBC/mm<sup>3</sup>)</li> <li>• For adults <math>\geq</math> 70 years old, altered mental status with no other recognized cause</li> </ul> <p><b>AND:</b></p> <p><b>Imaging:</b> two or more serial chest imaging results with either new and persistent OR progressive and persistent changes of</p>                                                                                                                                                                                                                                                                                                                                                        |          | Cause: CAP, HAP, VAP, |            | StEP infection and sepsis <sup>4</sup> |

|                 |                                                                                                                                                                                                                                                                                                                                                                                                                                                                                                                                                                                                                                                                                                                                                |  |                       |                                          |  |
|-----------------|------------------------------------------------------------------------------------------------------------------------------------------------------------------------------------------------------------------------------------------------------------------------------------------------------------------------------------------------------------------------------------------------------------------------------------------------------------------------------------------------------------------------------------------------------------------------------------------------------------------------------------------------------------------------------------------------------------------------------------------------|--|-----------------------|------------------------------------------|--|
|                 | <ul style="list-style-type: none"> <li>- infiltrate</li> <li>- consolidation</li> <li>- cavitation</li> </ul> <p>(In patients <b>without</b> underlying cardiac or pulmonary disease <b>one</b> definitive imaging test result is acceptable</p> <p><b>AND</b></p> <p>at least two of the following:</p> <ul style="list-style-type: none"> <li>• New onset of purulent sputum or change in character of sputum, or increased respiratory secretions, or increased suctioning requirements</li> <li>• New onset or worsening cough, or dyspnea, or tachypnea</li> <li>• Rales or bronchial breath sounds</li> <li>• Worsening gas exchange (with PF &lt;200, O2 supplementation &gt;5L/min, or start of (non)-invasive ventilation)</li> </ul> |  |                       |                                          |  |
| <b>Definite</b> | <p>Criteria for probable postoperative respiratory infection <b>AND</b></p> <p>One of the following criteria:</p> <ul style="list-style-type: none"> <li>- Positive culture of causative lung pathogen in respiratory secretions</li> <li>- Positive blood culture with causative pathogen for pneumonia</li> <li>- Isolation of a virus or proof of a viral pathogen in airway secretion by PCR</li> <li>- Histopathologic evidence for pneumonia</li> </ul>                                                                                                                                                                                                                                                                                  |  | Cause: CAP, HAP, VAP, | Definition of StEP + additional criteria |  |

**Table 8: Causes postoperative respiratory infectious complication**

|                                              |                                                                                                                       |                                                                                                |  |  |  |
|----------------------------------------------|-----------------------------------------------------------------------------------------------------------------------|------------------------------------------------------------------------------------------------|--|--|--|
| <b>Community acquired pneumonia (CAP)</b>    | Pneumonia occurring on day 0 or 1 after hospital admission, considering day of admission as day 0                     |                                                                                                |  |  |  |
| <b>Hospital acquired pneumonia (HAP)</b>     | Pneumonia occurring $\geq$ day 2 of hospital admission, considering day of admission as day 0                         |                                                                                                |  |  |  |
| <b>Ventilator-Associated pneumonia (VAP)</b> | Pneumonia occurring $\geq$ day 2 after the start of mechanical ventilation (MV) and $\leq$ day 2 after the end of MV. | Non-invasive ventilation like CPAP, BiPAP, optiflow are not considered mechanical ventilation. |  |  |  |

**Table 9: Abscess/Empyema**

| Endpoint               | Definition                                                                                                                                                                                                                                                                                                                        | Excluded | Limitation and comments | Ref.                              |
|------------------------|-----------------------------------------------------------------------------------------------------------------------------------------------------------------------------------------------------------------------------------------------------------------------------------------------------------------------------------|----------|-------------------------|-----------------------------------|
| <b>Abscess/empyema</b> |                                                                                                                                                                                                                                                                                                                                   |          |                         |                                   |
| <b>Possible</b>        | <ol style="list-style-type: none"> <li>Low clinical suspicion with one of: <ul style="list-style-type: none"> <li>Fever</li> <li>Cough, increased respiratory secretions</li> </ul> </li> </ol> <p><b>AND</b></p> <ol style="list-style-type: none"> <li>debatable Imaging test evidence of abscess or other infection</li> </ol> |          |                         |                                   |
| <b>Probable</b>        | <ol style="list-style-type: none"> <li>High clinical suspicion with one of: <ul style="list-style-type: none"> <li>Fever</li> <li>Cough, increased respiratory secretions</li> </ul> </li> </ol> <p><b>AND</b></p> <ol style="list-style-type: none"> <li>Imaging test evidence of abscess or other infection</li> </ol>          |          |                         | Step <sup>4</sup> with adaptation |

|                 |                                                                                                                                                                                                                                                             |  |  |  |
|-----------------|-------------------------------------------------------------------------------------------------------------------------------------------------------------------------------------------------------------------------------------------------------------|--|--|--|
| <b>Definite</b> | <p>1. Organism seen on Gram stain of lung tissue or pleural fluid, or identification of pathogenic organism from fluid or tissue from affected site</p> <p>2. Abscess or other evidence of infection on gross anatomical or histopathologic examination</p> |  |  |  |
|-----------------|-------------------------------------------------------------------------------------------------------------------------------------------------------------------------------------------------------------------------------------------------------------|--|--|--|

**Table 10: Surgical site infections**

| Endpoint                                                 | Definition                                                                                                                                                                                                                                                                                                                                                                                | Excluded | Limitation and comments | Ref.                                      |
|----------------------------------------------------------|-------------------------------------------------------------------------------------------------------------------------------------------------------------------------------------------------------------------------------------------------------------------------------------------------------------------------------------------------------------------------------------------|----------|-------------------------|-------------------------------------------|
| Surgical site infection (SSI)                            |                                                                                                                                                                                                                                                                                                                                                                                           |          |                         |                                           |
| <b>Superficial incisional SSI</b>                        | Involves only skin and subcutaneous tissue of the incision                                                                                                                                                                                                                                                                                                                                |          |                         |                                           |
| <b>Possible</b>                                          | <p>Patient has at least two of the following signs or symptoms:</p> <ul style="list-style-type: none"> <li>- localized pain or tenderness</li> <li>- localized swelling</li> <li>- erythema</li> <li>- heat.</li> </ul>                                                                                                                                                                   |          |                         |                                           |
| <b>Superficial incisional SSI</b><br><br><b>Definite</b> | <p>Patient has at least one of the following:</p> <ul style="list-style-type: none"> <li>- Purulent drainage from the superficial incision.</li> <li>- Organism(s) identified from an aseptically-obtained specimen from the superficial incision or subcutaneous tissue by a microbiologic testing method which is performed for purposes of clinical diagnosis or treatment.</li> </ul> |          |                         | StEP infection and sepsis <sup>4,10</sup> |

|                            |                                                                                                                                                                                                                                                                                                                                                                                                                                                                                        |  |  |                                           |
|----------------------------|----------------------------------------------------------------------------------------------------------------------------------------------------------------------------------------------------------------------------------------------------------------------------------------------------------------------------------------------------------------------------------------------------------------------------------------------------------------------------------------|--|--|-------------------------------------------|
|                            | <ul style="list-style-type: none"> <li>- Superficial incision that is deliberately opened and culture or non-culture based testing of the superficial incision or subcutaneous tissue is not performed</li> <li><b>AND</b> Patient has at least one of the following signs or symptoms: localized pain or tenderness, localized swelling, erythema or heat.</li> <li>- Abscess at physical examination, re-operation, histopathologic or radiologic examination.</li> </ul>            |  |  |                                           |
| <b>Deep incisional SSI</b> | Involves deep soft tissues of the incision (for example, fascial and muscle layers)                                                                                                                                                                                                                                                                                                                                                                                                    |  |  |                                           |
| <b>Possible</b>            | <p>Patient has at least two of the following signs or symptoms:</p> <ul style="list-style-type: none"> <li>- localized pain or tenderness</li> <li>- localized swelling</li> <li>- erythema</li> <li>- heat.</li> </ul>                                                                                                                                                                                                                                                                |  |  |                                           |
| <b>Definite</b>            | <p>Patient has at least <b>one</b> of the following:</p> <ul style="list-style-type: none"> <li>- Purulent drainage from the deep incision.</li> <li>- a deep incision that spontaneously dehisces, or is deliberately opened</li> </ul> <p><b>AND</b> organism(s) identified from the deep soft tissues of the incision by microbiologic testing which is performed for purposes of clinical diagnosis or treatment, or microbiologic testing is not performed.</p> <p><b>AND</b></p> |  |  | StEP infection and sepsis <sup>4,10</sup> |

|                        |                                                                                                                                                                                                                                                                                                                                                                                                                                                              |  |  |                                           |
|------------------------|--------------------------------------------------------------------------------------------------------------------------------------------------------------------------------------------------------------------------------------------------------------------------------------------------------------------------------------------------------------------------------------------------------------------------------------------------------------|--|--|-------------------------------------------|
|                        | <p>patient has at least one of the following signs or symptoms:<br/>fever (&gt;38°C), localized pain or tenderness.</p> <p>- an abscess or other evidence of infection involving the deep incision that is detected on gross anatomical or histopathologic exam, or imaging test.</p>                                                                                                                                                                        |  |  |                                           |
| <b>Organ/Space SSI</b> | Event involves any part of the body deeper than the fascial/muscle layers that is opened or manipulated during the operative procedure                                                                                                                                                                                                                                                                                                                       |  |  |                                           |
| <b>Possible</b>        | <p>Patient has at least one of the following signs or symptoms:</p> <ul style="list-style-type: none"> <li>- Fever &gt; 38 C</li> <li>- Pain in the area of surgical procedure (not superficial)</li> </ul>                                                                                                                                                                                                                                                  |  |  |                                           |
| <b>Probable</b>        | <p>Possible criteria</p> <p><b>AND</b></p> <p>Imaging test evidence suggestive of infection.</p>                                                                                                                                                                                                                                                                                                                                                             |  |  |                                           |
| <b>Definite</b>        | <p>Patient has at least one of the following:</p> <ol style="list-style-type: none"> <li>a. purulent drainage from a drain that is placed into the organ/space</li> <li>b. organism(s) identified from fluid or tissue in the organ/space performed for purposes of clinical diagnosis or treatment.</li> <li>c. an abscess or other evidence of infection involving the organ/space that is detected on gross anatomical or histopathologic exam</li> </ol> |  |  | StEP infection and sepsis <sup>4,10</sup> |

|  |  |  |  |  |
|--|--|--|--|--|
|  |  |  |  |  |
|--|--|--|--|--|

Table 11: Urinary system infection, blood stream infection, other infection

| Endpoint                                                           | Definition                                                                                                                                                                                                                                                                                                                                                                                                                                                                                                                                                                                                                                 | Excluded | Additionally reported                                                                                                                                                                       | Limitation and comments | Ref.              |
|--------------------------------------------------------------------|--------------------------------------------------------------------------------------------------------------------------------------------------------------------------------------------------------------------------------------------------------------------------------------------------------------------------------------------------------------------------------------------------------------------------------------------------------------------------------------------------------------------------------------------------------------------------------------------------------------------------------------------|----------|---------------------------------------------------------------------------------------------------------------------------------------------------------------------------------------------|-------------------------|-------------------|
| <b>Urinary tract infection (Catheter and not catheter related)</b> | <p>One of the following signs or symptoms:</p> <ul style="list-style-type: none"> <li>- Fever (&gt;38C)</li> <li>- Suprapubic tenderness*</li> <li>- Costovertebral angle pain or tenderness*</li> <li>- Urinary urgency<sup>^</sup></li> <li>- Urinary frequency<sup>^</sup></li> <li>- Dysuria<sup>^</sup></li> </ul> <p>Microbiologic cultures:</p> <p>Patient has a urine culture with no more than two species of organisms identified, at least one of which is a bacterium of <math>\geq 10^5</math> CFU/ml</p> <p>* Without other recognized cause<br/> <sup>^</sup> These symptoms cannot be used when a catheter is in place</p> |          | Catheter related: If indwelling urinary catheter had been in place for more than 2 consecutive days on the date of event AND was present on the day of the event or removed the day before. |                         | CDC <sup>11</sup> |
| <b>High Urinary system infection</b>                               | <ul style="list-style-type: none"> <li>- Identification of pathogenic organism from fluid or tissue from affected site</li> <li>- Abscess or other evidence of infection on gross anatomical examination, during invasive procedure, or during histopathologic examination</li> </ul> <p>OR one of</p> <ul style="list-style-type: none"> <li>- Fever &gt;38C</li> <li>- localised pain or tenderness with no other recognised cause</li> </ul> <p>AND ONE OF</p>                                                                                                                                                                          |          |                                                                                                                                                                                             |                         | StEP <sup>4</sup> |

|                                                                                          |                                                                                                                                                                                                                                                                                                                                                                                                                                                                                                                                                                                                                                                                     |                                                                                                                                                                                                                                                             |  |  |                   |
|------------------------------------------------------------------------------------------|---------------------------------------------------------------------------------------------------------------------------------------------------------------------------------------------------------------------------------------------------------------------------------------------------------------------------------------------------------------------------------------------------------------------------------------------------------------------------------------------------------------------------------------------------------------------------------------------------------------------------------------------------------------------|-------------------------------------------------------------------------------------------------------------------------------------------------------------------------------------------------------------------------------------------------------------|--|--|-------------------|
|                                                                                          | <ul style="list-style-type: none"> <li>- purulent drainage from affected site</li> <li>- organism identified in blood by culture or non-culture based biological testing</li> <li>- imaging suggestive of infection which if equivocal is supported by clinical correlation, specifically physician documented treatment for urinary system infection</li> </ul>                                                                                                                                                                                                                                                                                                    |                                                                                                                                                                                                                                                             |  |  |                   |
| <b>Primary Blood stream infection (BSI)/ Central line blood stream infection (CLBSI)</b> | <p>A Laboratory Confirmed Bloodstream Infection (LCBI) that is not included in the common commensal list and is not secondary to an infection at another body site</p> <p>OR</p> <p>Patient has at least one of the following signs or symptoms: fever &gt;38C, chills or hypotension, and at least one of the following:</p> <p>(a) Common skin contaminant cultured from two or more blood cultures drawn on separate occasions</p> <p>(b) Common skin contaminant cultured from at least one blood culture from a patient with an intravascular line, and the physician institutes appropriate antimicrobial therapy</p> <p>(c) Positive blood antigen test.</p> | <p>Common commensal list: see: Common Commensal organisms include, but are not limited to, diphtheroids (Corynebacterium spp. not C. diphtheria), Bacillus spp. (not B. anthracis), Propionibacterium spp., coagulase-negative staphylococci (including</p> |  |  | CDC <sup>12</sup> |

|  |  |                                                                                                                                                                                                                                                                                                                                                                                 |  |  |  |
|--|--|---------------------------------------------------------------------------------------------------------------------------------------------------------------------------------------------------------------------------------------------------------------------------------------------------------------------------------------------------------------------------------|--|--|--|
|  |  | <p>S. epidermidis), viridans group streptococci, Aerococcus spp. Micrococcus spp. and Rhodococcus spp</p> <p>Organisms that are parasites and viruses.</p> <p>Campylobacter, Salmonella, Shigella, Listeria, Vibrio and Yersinia as well as C. difficile, Enterohemorrhagic E. coli, and Enteropathogenic E. coli.</p> <p>Blastomyces, Histoplasma, Coccidioides, Paracocci</p> |  |  |  |
|--|--|---------------------------------------------------------------------------------------------------------------------------------------------------------------------------------------------------------------------------------------------------------------------------------------------------------------------------------------------------------------------------------|--|--|--|

|                                                 |                                                                                                                                                                                                                                                                                                                                                                                                                                                                                                                                                                      |                                                        |  |                                                                                            |                                               |
|-------------------------------------------------|----------------------------------------------------------------------------------------------------------------------------------------------------------------------------------------------------------------------------------------------------------------------------------------------------------------------------------------------------------------------------------------------------------------------------------------------------------------------------------------------------------------------------------------------------------------------|--------------------------------------------------------|--|--------------------------------------------------------------------------------------------|-----------------------------------------------|
|                                                 |                                                                                                                                                                                                                                                                                                                                                                                                                                                                                                                                                                      | dioides,<br>Cryptoco<br>ccus, and<br>Pneumoc<br>ystis. |  |                                                                                            |                                               |
| <b>Infection<br/>eci/ 'other<br/>infection'</b> | Strong clinical suspicion of infection but the source has not been confirmed because clinical information suggests more than one possible site, OR infection is not a respiratory infection, surgical site infection, primary bloodstream infection or urinary tract infection: meeting two or more of the following criteria:<br><br>Core temperature < 36C or >38C;<br>white cell count >12x10 <sup>9</sup> l-1 or < 4x10 <sup>9</sup> l-1,<br>respiratory rate >20 breaths per minute or PaCO <sub>2</sub> < 4.7 kPa (35mmHg);<br>Pulse rate >90 beats per minute |                                                        |  | CDC and EPCO definitions are used for 'Infection eci' criteria. We added 'Other infection' | CDC <sup>13</sup><br>AND<br>EPCO <sup>2</sup> |

**Table 12: Postoperative renal complications**

| Endpoint                         | Definition                                                                                                                                                                                                                                                                                                                                                                                                                                                                                                | Excluded | Limitation and comments | Ref.                               |
|----------------------------------|-----------------------------------------------------------------------------------------------------------------------------------------------------------------------------------------------------------------------------------------------------------------------------------------------------------------------------------------------------------------------------------------------------------------------------------------------------------------------------------------------------------|----------|-------------------------|------------------------------------|
| <b>Acute Kidney Injury (AKI)</b> | <p>Stage 1: Increase in serum creatinine by <math>\geq 0.3</math> mg/dl (<math>\geq 26.5</math> <math>\mu\text{mol/L}</math>) within 48 hours OR increase in serum creatinine to 1.5-1.9 times baseline.</p> <p>Stage 2: increase in serum creatinine to 2.0-2.9 times baseline</p> <p>Stage 3: increase in serum creatinine to <math>\geq 3</math> times baseline OR increase in serum creatinine to <math>\geq 353.6</math> <math>\mu\text{mol/L}</math> OR initiation of renal replacement therapy</p> |          |                         | StEP Renal Endpoints <sup>14</sup> |

**Table 13: Postoperative blood loss**

| Endpoint                                         | Definition                                                                                                                                                                                                                                                                                                                                                                                                                                                                                                                                                                                                                                                                                                                                                                                                                                                                                          | Excluded | Limitation and comments | Ref.               |
|--------------------------------------------------|-----------------------------------------------------------------------------------------------------------------------------------------------------------------------------------------------------------------------------------------------------------------------------------------------------------------------------------------------------------------------------------------------------------------------------------------------------------------------------------------------------------------------------------------------------------------------------------------------------------------------------------------------------------------------------------------------------------------------------------------------------------------------------------------------------------------------------------------------------------------------------------------------------|----------|-------------------------|--------------------|
| <b>Postoperative bleeding in cardiac surgery</b> | <p>Type 1: bleeding that is not actionable and does not cause the patient to seek an unscheduled performance of studies, hospitalization, or treatment by a health care professional; it may include episodes leading to self-discontinuation of medical therapy by the patient without consulting a health care professional.</p> <p>Type 2: any overt, actionable sign of hemorrhage (e.g., more bleeding than would be expected for a clinical circumstance, including bleeding found by imaging alone) that does not fit the criteria for type 3, type 4, or type 5 but does meet at least one of the following criteria: requiring nonsurgical, medical intervention by a health care professional; leading to hospitalization or increased level of care; or prompting evaluation.</p> <p>Type 3a: overt bleeding plus a hemoglobin drop of 3 to 5 g/dL* (provided the hemoglobin drop is</p> |          |                         | <sup>15</sup> BARC |

|                                                  |                                                                                                                                                                                                                                                                                                                                                                                                                                                                                                                                                                                                                                                                                                                                                                                                                                                                                                                                                                                                                                                                                                                                                        |  |  |  |
|--------------------------------------------------|--------------------------------------------------------------------------------------------------------------------------------------------------------------------------------------------------------------------------------------------------------------------------------------------------------------------------------------------------------------------------------------------------------------------------------------------------------------------------------------------------------------------------------------------------------------------------------------------------------------------------------------------------------------------------------------------------------------------------------------------------------------------------------------------------------------------------------------------------------------------------------------------------------------------------------------------------------------------------------------------------------------------------------------------------------------------------------------------------------------------------------------------------------|--|--|--|
|                                                  | <p>related to bleed); any transfusion with overt bleeding.</p> <p>Type 3b: overt bleeding plus a hemoglobin drop of 5 g/dL (provided the hemoglobin drop is related to bleed); cardiac tamponade; bleeding requiring surgical intervention for control (excluding dental, nasal, skin, and hemorrhoid); bleeding requiring intravenous vasoactive agents.</p> <p>Type 3c: intracranial hemorrhage (does not include microbleeds or hemorrhagic transformation, does include intraspinal); subcategories confirmed by autopsy or imaging, or lumbar puncture; intraocular bleed compromising vision.</p> <p>Type 4: coronary artery bypass grafting-related bleeding; perioperative intracranial bleeding within 48 hours; reoperation after closure of sternotomy for the purpose of controlling bleeding; transfusion of 5 U of whole blood or packed red blood cells within a 48-hour period; chest tube output 2 L within a 24-hour period.</p> <p>Type 5a: probable fatal bleeding; no autopsy or imaging confirmation but clinically suspicious.</p> <p>Type 5b: definite fatal bleeding; overt bleeding or autopsy, or imaging confirmation.</p> |  |  |  |
| <b>Postoperative bleeding noncardiac surgery</b> | Postoperative bleeding Clavien Dindo classification $\geq 3$                                                                                                                                                                                                                                                                                                                                                                                                                                                                                                                                                                                                                                                                                                                                                                                                                                                                                                                                                                                                                                                                                           |  |  |  |

In addition, all adverse events in the postoperative period will be graded according to the Clavien-Dindo system<sup>16</sup>:

|           |                                                                                                                                                                                                                                                                                                                                                             |
|-----------|-------------------------------------------------------------------------------------------------------------------------------------------------------------------------------------------------------------------------------------------------------------------------------------------------------------------------------------------------------------|
| Grade I   | Any deviation from the normal postoperative course without the need for pharmacological treatment or surgical, endoscopic and radiological interventions. Allowed therapeutic regimens are: drugs as anti-emetics, antipyretics, analgetics, diuretics and electrolytes and physiotherapy. This grade also includes wound infections opened at the bedside. |
| Grade II  | Requiring pharmacological treatment with drugs other than such allowed for grade I complications. Blood transfusions and total parenteral nutrition are also included.                                                                                                                                                                                      |
| Grade III | Requiring surgical, endoscopic or radiological intervention <ol style="list-style-type: none"><li>Intervention not under general anesthesia</li><li>Intervention under general anesthesia</li></ol>                                                                                                                                                         |
| Grade IV  | Life-threatening complication (e.g. brain hemorrhage, ischemic stroke, subarachnoidal bleeding, but excluding transient ischemic attacks) requiring Intensive Care management                                                                                                                                                                               |
| Grade V   | Death of a patient                                                                                                                                                                                                                                                                                                                                          |

**References:**

1. Jackson, A. I. R. *et al.* Systematic reviews and consensus definitions for the Standardised Endpoints in Perioperative Medicine (StEP) initiative: mortality, morbidity, and organ failure. *Br. J. Anaesth.* **130**, 404–411 (2023).
2. Jammer, I. *et al.* Standards for definitions and use of outcome measures for clinical effectiveness research in perioperative medicine: European Perioperative Clinical Outcome (EPCO) definitions: A statement from the ESA-ESICM joint taskforce on perioperative outcome measur. *Eur. J. Anaesthesiol.* **32**, 88–105 (2015).
3. Ranieri, V. M. *et al.* Acute respiratory distress syndrome: The Berlin definition. *JAMA - J. Am. Med. Assoc.* **307**, 2526–2533 (2012).
4. Barnes, J. *et al.* Systematic review and consensus definitions for the Standardised Endpoints in Perioperative Medicine (StEP) initiative: infection and sepsis. *Br. J. Anaesth.* **122**, 500–508 (2019).
5. Hol, L. *et al.* Driving Pressure during General Anesthesia for Open Abdominal Surgery (DESIGNATION): Study protocol of a randomized clinical trial. *Trials* **21**, 1–15 (2020).
6. Beattie, W. S. *et al.* Systematic review and consensus definitions for the Standardized Endpoints in Perioperative Medicine (StEP) initiative: cardiovascular outcomes. *Br. J. Anaesth.* **126**, 56–66 (2021).
7. Thygesen, K. *et al.* Fourth universal definition of myocardial infarction (2018). *Eur. Heart J.* **40**, 237–269 (2019).
8. McDonagh, T. A. *et al.* 2021 ESC Guidelines for the diagnosis and treatment of acute and chronic heart failure. *Eur. Heart J.* **42**, 3599–3726 (2021).
9. Bone, R. C. *et al.* Definitions for Sepsis and Organ Failure and Guidelines for the Use of Innovative Therapies in Sepsis. *Chest* **101**, 1644–1655 (1992).
10. Cdc, T., Report, H. A. I. P., Care, S. & Project, I. Surgical Site Infection Event ( SSI ) Introduction : Settings : Requirements : 1–39 (2022).
11. NHSN. Urinary Tract Infection ( Catheter-Associated Urinary Tract Infection [ CAUTI ] and Non-Catheter-Associated Urinary Tract Infection [ UTI ]) Events Definitions : *Centers Dis. Control Prev.* 1–18 (2022).
12. Centers, F. D. C. A. P. Bloodstream Infection Event ( Central Line-Associated Bloodstream Infection and Non-central Line Associated Bloodstream Infection ) Table of Contents. . [https://www.cdc.gov/nhsn/pdfs/pscmanual/4psc\\_clabscurrent.pdf](https://www.cdc.gov/nhsn/pdfs/pscmanual/4psc_clabscurrent.pdf) (accessed 27 Jan 2021). 1–50 (2021).
13. Horan, T. C., Andrus, M. & Dudeck, M. A. CDC/NHSN surveillance definition of health care-associated infection and criteria for specific types of infections in the acute care setting. *Am. J. Infect. Control* **36**, 309–332 (2008).
14. McIlroy, D. R. *et al.* Systematic review and consensus definitions for the Standardised Endpoints in Perioperative Medicine (StEP) initiative: renal endpoints. *Br. J. Anaesth.* **121**, 1013–1024 (2018).
15. Mehran, R. *et al.* Standardized bleeding definitions for cardiovascular clinical trials: A consensus report from the bleeding academic research consortium. *Circulation* **123**, 2736–2747 (2011).
16. Dindo, D., Demartines, N. & Clavien, P. A. Classification of surgical complications: A new proposal with evaluation in a cohort of 6336 patients and results of a survey. *Ann. Surg.* **240**, 205–213 (2004).
