# Supplementary material for: Cohort profile of BIGPROMISE: a perioperative biobank of a high-risk surgical population
Source: PubMed Central journal article supplement — BMJ Open. 2024 Jun 11;14(6):e078307. doi: 10.1136/bmjopen-2023-078307 (PMC11168131; doi:10.1136/bmjopen-2023-078307), 2024-06-11
Supplement: bmjopen-2023-078307supp003.pdf [file bmjopen-2023-078307supp003.pdf]

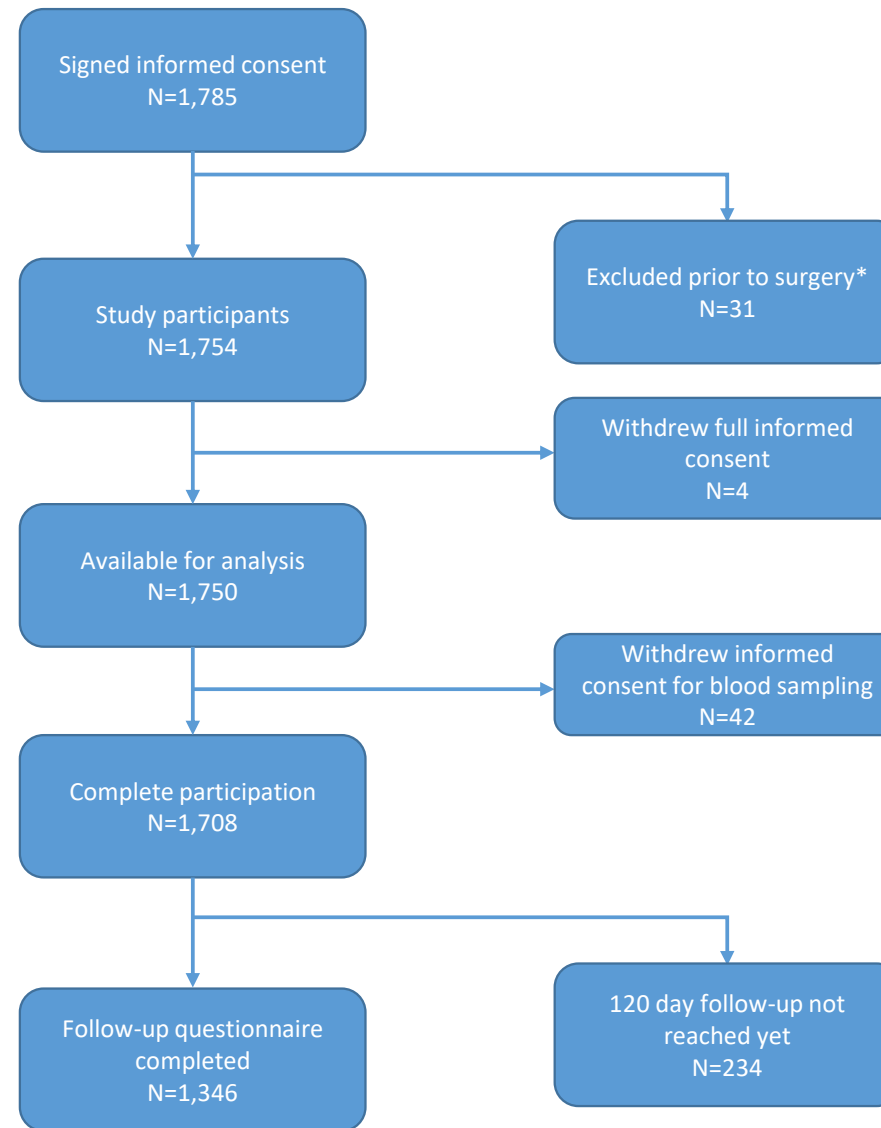

\* Reasons for exclusion: Logistics, surgical indication, blood draw not possible or competing study
