# Supplementary material for: Cohort profile of BIGPROMISE: a perioperative biobank of a high-risk surgical population
Source: PubMed Central journal article supplement — BMJ Open. 2024 Jun 11;14(6):e078307. doi: 10.1136/bmjopen-2023-078307 (PMC11168131; doi:10.1136/bmjopen-2023-078307), 2024-06-11
Supplement: bmjopen-2023-078307supp004.pdf [file bmjopen-2023-078307supp004.pdf]

**Supplementary Table 1. Study parameters****Biomarkers**

PCT, CRPhs, IL-6, GDF-15, sFLT, NT-proBNP, cTNThs, CysC and NGAL, Hb, Ht, MCV, RDW, reticulocytes, RET-He thrombocytes, leucocytes, MPV, urea, creatinine, sodium, potassium, chloride, calcium, phosphate, magnesium, ASAT, ALAT, LDH, ALP, gamma GT, bilirubin, CK, albumin, glucose, Cholesterol, Triglycerides, HDL-cholesterol, LDL-cholesterol, serum iron, ferritin, transferrin saturation, vitamin D, TSH, FT4, igf-1, SHBG, NLR.

**Medical History**

Age in years, Sex, BMI (kg/m<sup>2</sup>), Unintentional weight loss (>3kg) over the past 3 months, Smoking status, Alcohol consumption, Diabetes Mellitus, COPD  
Hypertension, Congestive heart failure, Atrial fibrillation, Stroke, Myocardial infarction, Prior cardiac surgery, Peripheral artery disease, Chronic renal failure, history of cancer, Left ventricular ejection fraction, NYHA class, EuroSCORE, ASA classification, Charlson comorbidity index, Disability, Clinical Frailty Scale

**Medication Use**

Beta blockers, ACE inhibitor, Angiotensin receptor blockers, Diuretics, Plateletinhibitors, Steroids, Calciumchannel inhibitors, Non-steroidal anti-inflammatory drugs, Statins, other immunosuppressive drugs, levothyroxin use, Paracetamol, Opioids, Anitdepressants, Anticonvulsiva

**Operative details**

Surgery type, surgical approach, urgency, Epidural Analgesia, Sevoflurane use, Oxygen saturation before induction of anaesthesia (first measured on the OR), Intraoperative hypotension (MAP <55 mmHg, non-cardiac surgery only), Fluid balance end of surgery (in ml), Estimated operative blood loss (in ml), Cell saver use, Lowest mean arterial pressure, Lowest operative heart rate (bpm), Surgical APGAR score (number), Allogenic blood product transfusion, Coagulation products and medication, Intraoperative steroids, Cardiopulmonary bypass time, Aortic cross clamping, (minutes), surgery duration (min)

**Postoperative details**

Modified early warning score (postoperative day 1-7), postoperative pain score (NRS, max and mean, postoperative day 1-7), Packed Red Blood cells transfusion (postoperative day 1-7), other allogenic blood products (postoperative day 1), Coagulation products and medication (postoperative day 1), reoperation.

**Admission and Discharge**

Hospital length of stay (LOS), ICU LOS, ICU re-admission, hospital re-admission, days alive and out of hospital 120 days.
