# Supplementary material for: Cohort profile of BIGPROMISE: a perioperative biobank of a high-risk surgical population
Source: PubMed Central journal article supplement — BMJ Open. 2024 Jun 11;14(6):e078307. doi: 10.1136/bmjopen-2023-078307 (PMC11168131; doi:10.1136/bmjopen-2023-078307), 2024-06-11
Supplement: bmjopen-2023-078307supp005.pdf [file bmjopen-2023-078307supp005.pdf]

Supplementary Table 2. Perioperative blood sampling and clinical data collection

|                  | <b>OC</b> | <b>Before surgery</b> | <b>After surgery</b> | <b>POD 1</b> | <b>POD 2</b> | <b>POD 3</b> | <b>30 days</b> | <b>120 days</b> | <b>1 year</b> | <b>2 years</b> |
|------------------|-----------|-----------------------|----------------------|--------------|--------------|--------------|----------------|-----------------|---------------|----------------|
| Counselling      | X         |                       |                      |              |              |              |                |                 |               |                |
| Informed consent |           | X                     |                      |              |              |              |                |                 |               |                |
| Data collection  |           | X                     |                      |              |              |              | X              | X               | X             | X              |
| Blood sample     |           | X                     | X                    | X            | X            | X            |                |                 |               |                |
| Questionnaire    |           | X                     |                      |              |              |              |                | X               |               |                |

OC: outpatient clinic, POD: postoperative day
