# Supplementary material for: Cohort profile of BIGPROMISE: a perioperative biobank of a high-risk surgical population
Source: PubMed Central journal article supplement — BMJ Open. 2024 Jun 11;14(6):e078307. doi: 10.1136/bmjopen-2023-078307 (PMC11168131; doi:10.1136/bmjopen-2023-078307), 2024-06-11
Supplement: bmjopen-2023-078307supp006.pdf [file bmjopen-2023-078307supp006.pdf]

Supplementary Table 3

| Characteristics                       | N (%)         | Missing values N (%) |
|---------------------------------------|---------------|----------------------|
| Number of participants                | 1,750         |                      |
| Age                                   | 66 [60, 73]   | 7 (0.4%)             |
| Female                                | 481 (27.6%)   | 5 (0.3%)             |
| ASA class                             |               | 28 (1.6%)            |
| ASA I                                 | 30 (1.7%)     |                      |
| ASA II                                | 422 (24.5%)   |                      |
| ASA III                               | 1,169 (67.9%) |                      |
| ASA IV                                | 101 (5.9%)    |                      |
| ASA V                                 | 0 (0.0%)      |                      |
| Clinical Frailty Score, age >65 years | 1,029         | 13 (1.2%)            |
| Fit (1-3)                             | 642 (62.4%)   |                      |
| Risk of frailty (4)                   | 231 (22.4%)   |                      |
| Mild frailty (5)                      | 84 (8.2%)     |                      |
| Frail (6-8)                           | 59 (5.7%)     |                      |
| Cardiac Surgery                       | 852 (48.7%)   | 0 (0%)               |
| CABG                                  | 444 (25.4%)   |                      |
| AVR                                   | 157 (9.0%)    |                      |
| MVP/R                                 | 107 (6.1%)    |                      |
| CABG + AVR                            | 106 (6.1%)    |                      |

|                                              |               |        |
|----------------------------------------------|---------------|--------|
| Bentall procedure                            | 46 (2.6%)     |        |
| CABG + MVP/R                                 | 16 (0.9%)     |        |
| AVR + MVP/R                                  | 13 (0.7%)     |        |
| TVP                                          | 3 (0.2%)      |        |
| AVR + TVP                                    | 2 (0.1%)      |        |
| Other                                        | 4 (0.2%)      |        |
| Pulmonary Surgery                            | 76 (4.3%)     | 0 (0%) |
| Segmentectomy                                | 61 (3.5%)     |        |
| Lobectomy                                    | 3 (0.2%)      |        |
| Pneumonectomy                                | 12 (0.7%)     |        |
| Gastro-Intestinal- and Hepatobiliary surgery | 452 (25.8%)   | 0 (0%) |
| Colorectal surgery                           | 280 (16.0%)   |        |
| Pancreatic surgery                           | 118 (6.7%)    |        |
| Other Gastro-intestinal surgery              | 54 (3.1%)     |        |
| Vascular Surgery                             | 194 (10.1%)   | 0 (0%) |
| Aortic surgery                               | 100 (5.7%)    |        |
| Peripheral vascular surgery                  | 94 (5.4%)     |        |
| Cystectomy                                   | 41 (2.4%)     | 0 (0%) |
| Reoperation                                  | 39 (2.2%)     | 0 (0%) |
| Open approach                                | 1,106 (63.2%) | 0 (0%) |
| Biobank participant                          | 1,593 (91.0%) | 0 (0%) |

Baseline characteristics of the BIGPROMISE cohort at January 1<sup>st</sup> 2024. Data are displayed in numbers (%) or median (Interquartile range). ASA: American Society of Anaesthesiologists. CABG: Coronary artery bypass grafting. AVR: Aortic valve replacement. MVP/R: Mitral valve plasty / Replacement. TVP: Tricuspid valve plasty.
